# Supplementary material
Source: PubMed Central journal article supplement (PMC3911442)
Supplement: JCM.00390-13_zjm999092992so1.pdf [file JCM.00390-13_zjm999092992so1.pdf]

**Supplemental Table S1:** Primers used for PCR and sequencing

| Gene                       | Function                     | Primer         | PCR and sequencing primers (5'-3')<br>forward/reverse  | GenBank accession<br>number | Positions     | Amplicon<br>size (bp) |
|----------------------------|------------------------------|----------------|--------------------------------------------------------|-----------------------------|---------------|-----------------------|
| <i>cTPs</i>                | CTP synthase                 | P1967<br>P1968 | TGGTTGAATTCCTATGCTTCTT<br>ATAACAGCGGCTTCACTTGG         | ABDQ01000000                | 982-<br>1545  | 564                   |
| <i>glpK</i>                | Glycerol kinase              | P1965<br>P1966 | TCAATGCTTCCAGAAGTTAAACC<br>GCAAGACCTGCAAGATAAGCA       | ABDQ01000000                | 637-<br>1349  | 713                   |
| <i>rpoB</i>                | RNA polymerase B subunit     | P1985<br>P1986 | CCTAAGGCTGAACATGATGG<br>TTCCTGCCATCTTATCTCCAA          | ACSJ01000000                | 2080-<br>2821 | 742                   |
| <i>gyrA</i>                | DNA gyrase A subunit         | P1987<br>P1988 | TTTGATGGAGAAGAAAAGAACC<br>TTCTTCTTGTTATAACTTCTTCTTGGGA | ACSJ01000000                | 442-<br>1087  | 646                   |
| <i>dnaK</i>                | Chaperone protein (hsp70)    | P1989<br>P1990 | GCATCACTTGCATATGGTCTTG<br>TTGAACTGCTGCACCCATAG         | ACSJ01000000                | 451-<br>1050  | 600                   |
| Botulinolysin <sup>1</sup> | Pore-forming toxin           | P2006<br>P2007 | TGCAAATAGRAATCTTRTAGAAAAYAA<br>CATTCCCAWGCAAGRCCWG     | NZ_ACSJ01000007             | 405-<br>1475  | 1071                  |
| Novyilysin                 | Pore-forming toxin           | P2004<br>P2005 | AATCCAGCATATCCGATTTCA<br>CACCATTCCCATGCAAGAC           | NZ_ACSJ01000007             | 1141-<br>1478 | 338                   |
| C2 toxin<br>component I    | Actin ADP-ribosylating toxin | P2012<br>P2013 | GAAGAAAAACGTTGGTTTACGA<br>TTGGCTTTACAGATAGAGCAGAA      | AB465554                    | 73-<br>871    | 799                   |
| C2 toxin<br>component II   | Actin ADP-ribosylating toxin | P2014<br>P2015 | AAAAGCTGTAGCATGGGATGA<br>GGATAGGTTCCACCAGGATTT         | AB465554                    | 621-<br>1238  | 618                   |

<sup>1</sup>Botunolysin gene is noted "tetanolysin O" in the genome annotation of NZ\_ACSJ01000007.

**Supplemental Table S2.** Genome sequences and strains used in this study. Additional strains were *C. botulinum* type C 468, *C. novyi* A ATCC17861<sup>T</sup> (AIP10062<sup>T</sup>), *C. novyi* B AIP212.86, *C. haemolyticum* ATCC9650<sup>T</sup> (AIP10052<sup>T</sup>).

|                                                                        | GenBank genome sequence accession number (sequence status) where available |
|------------------------------------------------------------------------|----------------------------------------------------------------------------|
| AIP981.10                                                              | This study                                                                 |
| <i>Clostridium botulinum</i> A ATCC 3502                               | AM412317 (complete)                                                        |
| <i>Clostridium botulinum</i> C str. Eklund                             | ABDQ01000000 (assembly)                                                    |
| <i>C. botulinum</i> type C 468                                         | This study                                                                 |
| <i>Clostridium botulinum</i> C/D mosaic str. BKT028387                 | AESB01000174 (assembly)                                                    |
| <i>Clostridium botulinum</i> C/D mosaic str. BKT015925                 | CP002410 (complete)                                                        |
| <i>Clostridium botulinum</i> C/D mosaic str. V891                      | AESCA00000000 (draft)                                                      |
| <i>Clostridium botulinum</i> C/D mosaic AIP26.09                       | This study                                                                 |
| <i>Clostridium botulinum</i> C/D mosaic str. 6813                      | This study                                                                 |
| <i>Clostridium botulinum</i> D/C mosaic str. OFD05                     | This study                                                                 |
| <i>Clostridium botulinum</i> D/C mosaic str. OFD09                     | This study                                                                 |
| <i>Clostridium botulinum</i> D str. 1873                               | AC SJ01000000 (assembly)                                                   |
| <i>C. haemolyticum</i> AIP10052 <sup>T</sup> (=ATCC9650 <sup>T</sup> ) | This study                                                                 |
| <i>C. novyi</i> A AIP10062 <sup>T</sup> (=ATCC17861 <sup>T</sup> )     | This study                                                                 |
| <i>Clostridium novyi</i> B AIP212.86                                   | This study                                                                 |
| <i>Clostridium novyi</i> NT                                            | CP000382 (complete)                                                        |
| <i>Clostridium perfringens</i> str. 13                                 | BA000016 (complete)                                                        |
